# Supplementary material for: Re-excitation of localized electrons in SnO2 quantum dots for enhanced water photolysis activity
Source: Royal Society of Chemistry journal article supplement (doi:10.1039/c6ra15932j), 2016-01-01
Supplement: c6ra15932j1.pdf [file c6ra15932j1.pdf]

1           Re-excitation of localized electrons in SnO<sub>2</sub> quantum dots for  
2                                   enhanced water photolysis activity

3           Xianqun Chen,<sup>1,2</sup>Liping Li,<sup>1</sup>Yuelan Zhang,<sup>1</sup>Yangsen Xu,<sup>1</sup>Guangshe Li\*<sup>1,3</sup>

4   <sup>1</sup>Key Laboratory of Design and Assembly of Functional Nanostructures, Fujian Institute of  
5   Research on the Structure of Matter, Chinese Academy of Sciences, Fuzhou, 350002, P.R. China

6   <sup>2</sup>College of Materials Science and Engineering, Fujian Normal University, Fuzhou 350007, P. R.  
7   China

8   <sup>3</sup>State Key Laboratory of Inorganic Synthesis and Preparative Chemistry, College of Chemistry,  
9   Jilin University, Changchun 130012, P.R. China

10                                   Supporting Information

11

12   **1. XRD and TG analysis of SCTX**

13           XRD patterns of SCTX are displayed in Figure S1. The presence of two sets of diffraction  
14 peaks that could be ascribed to SnO<sub>2</sub> and g-C<sub>3</sub>N<sub>4</sub>, respectively, demonstrated the formation of  
15 hybrids between SnO<sub>2</sub> nanoparticles and g-C<sub>3</sub>N<sub>4</sub>. Furthermore, thermal gravimetric measurements  
16 (Figure S2) shows that the g-C<sub>3</sub>N<sub>4</sub> becomes unstable when the heat temperature above 500 °C. The  
17 mass of hybrids SCT3.0, SCT8.0 and SCT18.0 decreased rapidly in the temperature range 500 °C to  
18 660 °C, indicating that the combustion of g-C<sub>3</sub>N<sub>4</sub> occurred in this temperature range.<sup>1</sup> All samples  
19 exhibited a weight loss of about 60%, confirmed the 40% mass ratios of SnO<sub>2</sub> in the  
20 corresponding hybrids, which is consistent with the initial mass ratio of SnO<sub>2</sub>. Based on the data  
21 analysis results in reference<sup>2</sup>, the wide combustion temperature edge of SCT-18.0 should  
22 be attributed to the tight coupling between SnO<sub>2</sub> and g-C<sub>3</sub>N<sub>4</sub>.

1

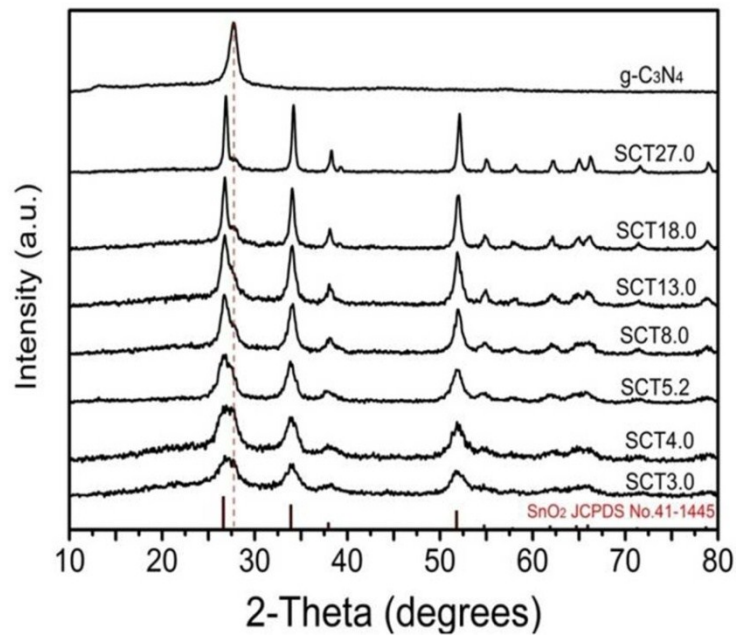

2

3

Figure S1. XRD patterns of SnO<sub>2</sub>-X/g-C<sub>3</sub>N<sub>4</sub> hybrids (SCTX).

4

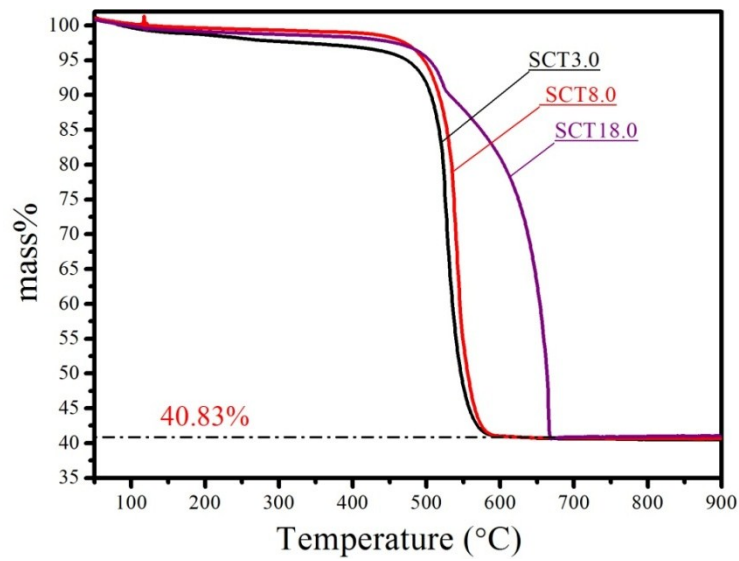

5

6

Figure S2. Thermal Gravity (TG) curves of SCT3.0, SCT8.0 and SCT18.0.

7

## 8 2 O1s XPS spectra

9 The signal at 531.5 eV presents the adsorbed oxygen species (OH<sup>-</sup>) caused by oxygen vacancy,<sup>3</sup>

1 and its relative integrate areas of absorbed oxygen species to the lattice oxygen decrease from 45.6  
 2 to 19.3, which can reflect a decreased oxygen vacancy concentration caused by SnO<sub>2</sub> grain growth.

3

4 **Table S1.** Binding energy (B.E.), full width at half maximum (FWHM) and integral areas of O1s core levels for  
 5 samples SCT3.0, SCT8.0, SCT13.0, SCT18.0.

| Peak          | Components         | B.E. (eV) | FWHM (eV) | Area ratio (%) |
|---------------|--------------------|-----------|-----------|----------------|
| O1s (SCT3.0)  | O-Sn <sup>4+</sup> | 530.2     | 1.5       | 37.2           |
|               | OH <sup>-</sup>    | 531.5     | 1.9       | 45.6           |
|               | H <sub>2</sub> O   | 532.8     | 1.9       | 17.2           |
| O1s (SCT8.0)  | O-Sn <sup>4+</sup> | 530.2     | 1.7       | 45.8           |
|               | OH <sup>-</sup>    | 531.4     | 1.8       | 41.7           |
|               | H <sub>2</sub> O   | 532.7     | 2.0       | 12.5           |
| O1s (SCT13.0) | O-Sn <sup>4+</sup> | 530.2     | 1.9       | 53.7           |
|               | OH <sup>-</sup>    | 531.3     | 1.8       | 33.5           |
|               | H <sub>2</sub> O   | 532.7     | 1.8       | 12.9           |
| O1s (SCT18.0) | O-Sn <sup>4+</sup> | 530.2     | 2.0       | 71.5           |
|               | OH <sup>-</sup>    | 531.5     | 1.7       | 19.3           |
|               | H <sub>2</sub> O   | 532.7     | 1.9       | 9.2            |

6

### 7 **3. Morphologies of the samples**

8 The morphologies of hybrids SCT4.0, SCT13.0 and SCT18.0 were directly observed by TEM  
 9 and HRTEM. As illustrated in Figure S3, SnO<sub>2</sub> particles (the black particles) in samples SCT4.0,  
 10 SCT13.0 and SCT18.0 were successfully dispersed onto the stacked g-C<sub>3</sub>N<sub>4</sub> layers (the gray color  
 11 part, as indicated by the report of reference 4) even though some of SnO<sub>2</sub> nanoparticles were  
 12 agglomerated. XRD analysis demonstrated that the crystallinity of SnO<sub>2</sub> nanocrystals in hybrids was

1 enhanced with their coarsening, which infers that the surface defect concentration could be also  
2 reduced. Carefully examining the HRTEM image of Figure S4(c) for SCT4.0, it can be found that  
3 the atom spots in (110) plane are not continuous, and a high density of dark holes (as marked by the  
4 white circles). These dark holes could be well-correlated to the oxygen vacancy sites. Using  
5 HRTEM analysis to demonstrate the existence of surface oxygen vacancy defects for nano-oxides  
6 has been reported in previous investigation.<sup>5</sup> Comparing to SCT4.0, the defect concentration in  
7 SCT13.0 (Figure S4f) is much lower. Alternatively, HRTEM of SCT18.0 in Figure 5(i) shows a nearly  
8 perfect atom arrangement in (110) lattice plane, suggesting the defect almost disappeared. These  
9 observations approved that annealing of SnO<sub>2</sub> in higher temperature could reduce the content of  
10 oxygen vacancy on the surface of SnO<sub>2</sub> nanocrystals. Figure S5 provides the grain size distribution  
11 of SnO<sub>2</sub> nanocrystals in SCT4.0, SCT13.0 and SCT18.0. The mean grain size of SnO<sub>2</sub> in SCT4.0 is  
12 3.9 nm, which is smaller than that of 12.6 nm in SCT13.0. The mean grain size of SnO<sub>2</sub> belongs to  
13 SCT-18.0 is 20.5 nm, which is larger than that calculated via XRD data broadening.

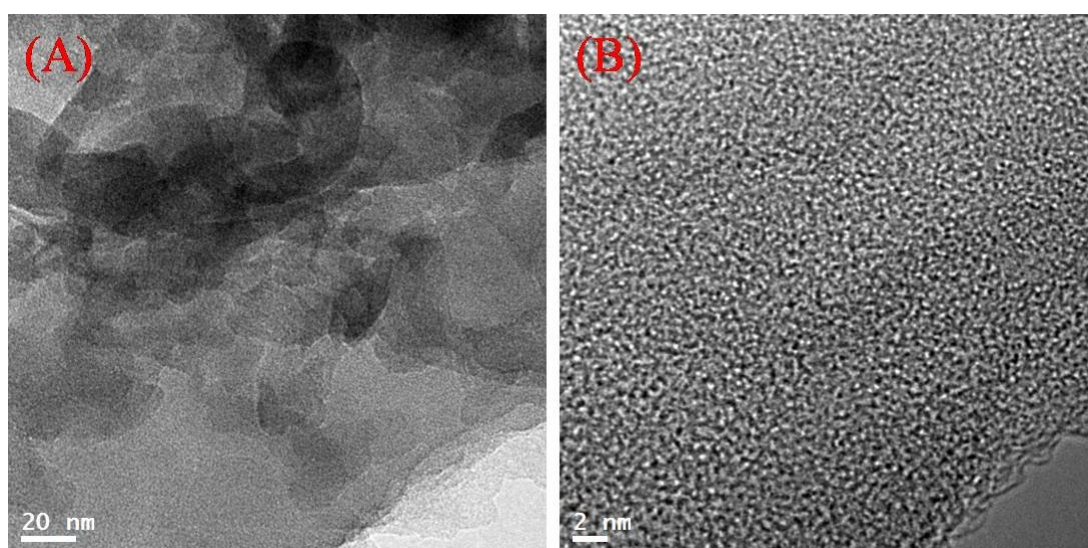

14  
15  
16

**Figure S3.** (A) TEM and (B) HRTEM image of g-C<sub>3</sub>N<sub>4</sub>.

1

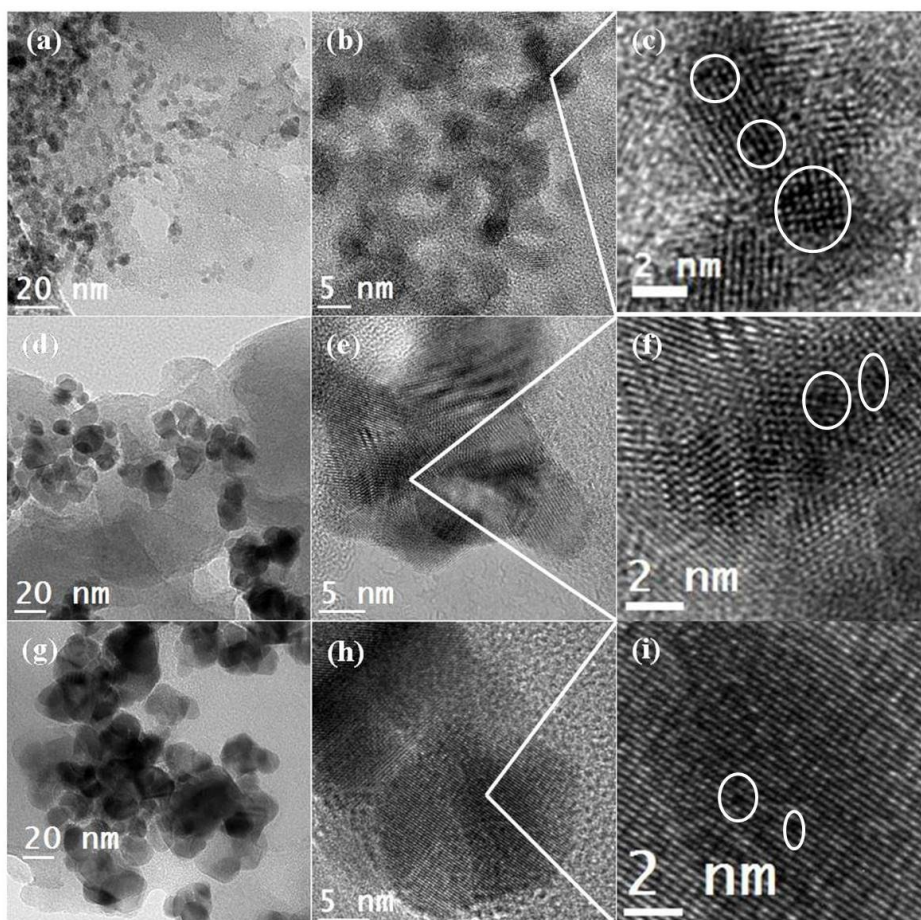

2

3 **Figure S4.**TEM, HRTEM and local magnified images for samples: (a, b, c) SCT4.0, (d, e, f) SCT13.0 and (g, h, i)

4 SCT18.0.

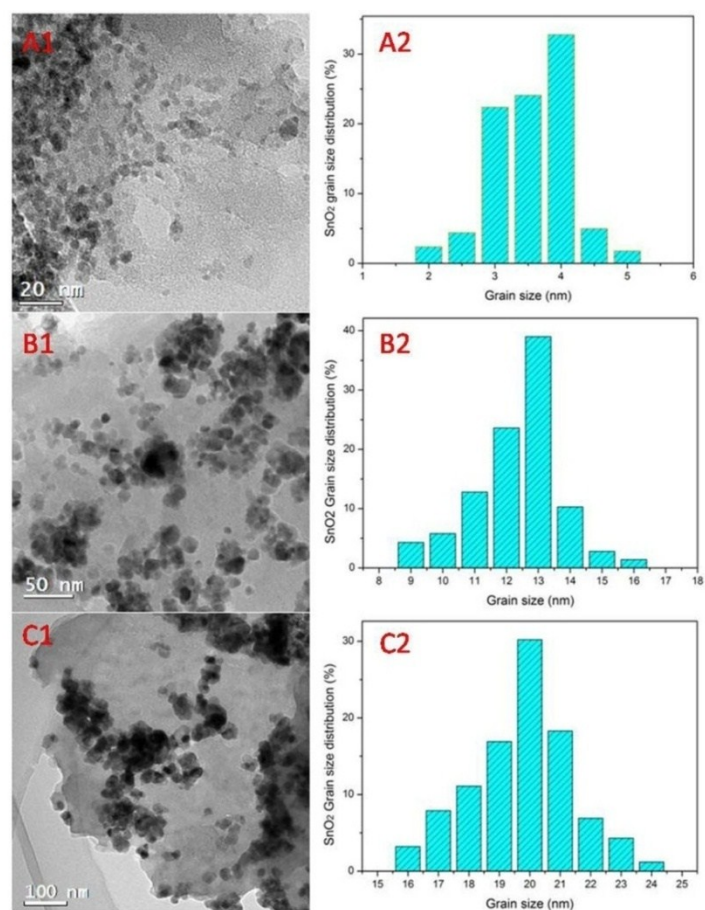

1

2 Figure S5. The grain size distribution of SnO<sub>2</sub>-4.0 (A1,A2), SnO<sub>2</sub>-13.0 (B1,B2) and SnO<sub>2</sub>-18.0 (C1, C2) when  
 3 supported on g-C<sub>3</sub>N<sub>4</sub>.

4 Table S2. The BET specific area measured for samples SCT-4.0, SCT-13.0 and SCT-18.0.

| Sample                                | SCT4.0 | SCT-13.0 | SCT-8.0 |
|---------------------------------------|--------|----------|---------|
| BET specific area (m <sup>2</sup> /g) | 105    | 72       | 45      |

5

#### 6 **4 Photocatalytic activity of SnO<sub>2</sub>-8.0**

7 The activity of as-prepared SnO<sub>2</sub>-8.0 in hydrogen generation from water splitting is really poor to  
 8 yield hydrogen of 3.0 μmol and 0 μmol after irradiation for 5h under the 260 nm and 420 nm light,  
 9 which approved its appropriate energy band position for hydrogen generating from water  
 10 photolysis.



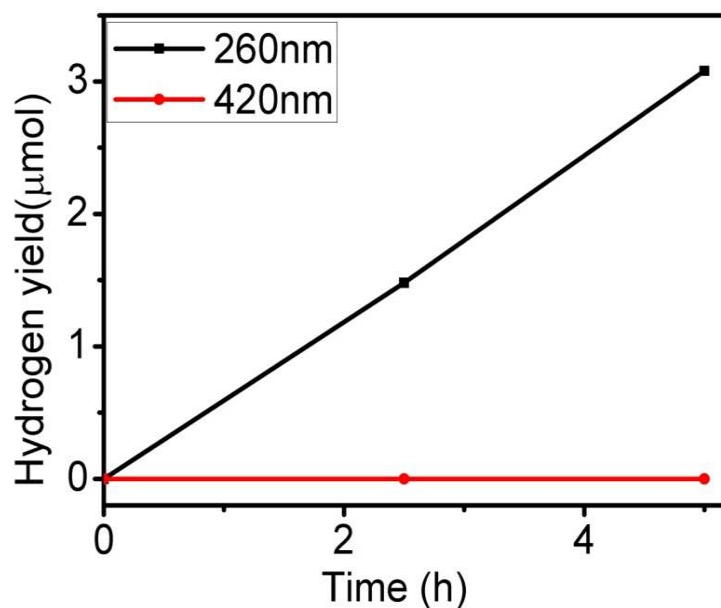

1

2 **Figure S6.** Catalytic hydrogen yield from water splitting for 100mg of as-prepared SnO<sub>2</sub> under ultraviolet ( $\lambda > 260$   
 3 nm, the black line) and visible ( $\lambda > 420$  nm, the red line) light irradiation with 300W Xe lamp.

#### 4 **References**

- 5 1. J. X. Sun, Y.P. Yuan, L.G. Qiu, X. Jiang, A.J. Xie, Y.H. Shen and J.F. Zhu, *Dalton. T*, 2012, 41,  
 6 6756-6763.
- 7 2.Y. He, L. Zhang, M. Fan, X. Wang, M. L. Walbridge, Q. Nong, Y. Wu, L. Zhao, *Sol. Energ.*  
 8 *Mat. and Sol. C*, 2015, 137, 175-184.
- 9 3. Das, A; Bonu, V; Prasad, A. K; Panda, D; Dhara, S; Tyagi, A. K, *J. Mater. Chem. C*, 2014, 2(1),  
 10 164-171.
- 11 4. X. Wang, K. Maeda, X. Chen, K. Takanebe, K. Domen, Y. Hou, X. Fu and M. Antonietti, *J. Am.*  
 12 *Chem. Soc.*, 2009, 131(5), 1680-1681.
- 13 5. N. J. Lawrence, J. R. Brewer, L. Wang, T.S. Wu, J. Wells-Kingsbury, M. M. Ihrig, G. Wang, Y.  
 14 L. Soo, W.N. Mei and C. L. Cheung, *Nano. Lett*, 2011, 11(7), 2666-2671.
